# Supplementary material for: Recruitment of ubiquitin-activating enzyme UBA1 to DNA by poly(ADP-ribose) promotes ATR signalling
Source: PubMed Central journal article supplement (PMC6238597; doi:10.26508/lsa.201800096), 2018-06-21
Supplement: LSA-2018-00096_review_history.pdf [file LSA-2018-00096_review_history.pdf]

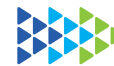

## Recruitment of Ubiquitin-activating enzyme UBA1 to DNA by Poly(ADP-ribose) promotes ATR signalling

Ramhari Kumbhar, Sophie Vidal-Eychenié, Dimitrios Georgios Kontopoulos, Marion Larroque, Christian Larroque, Jihane Basbous<sup>1</sup>, Sofia Kossida, Cyril Ribeyre and Angelos Constantinou  
DOI: 10.26508/lsa.201800096

---

### Review timeline:

|                     |              |
|---------------------|--------------|
| Submission Date:    | 29 May 2018  |
| Editorial Decision: | 31 May 2018  |
| Revision Received:  | 14 June 2018 |
| Accepted:           | 14 June 2018 |

---

### Report:

(Note: Letters and reports are not edited. The original formatting of letters and referee reports may not be reflected in this compilation.)

Please note that the manuscript was previously reviewed at another journal and the reports were taken into account in the decision-making process at Life Science Alliance. Since the original reviews are not subject to Life Science Alliance's transparent review process policy, the reports and author response cannot be published.

---

1st Editorial Decision

31 May 2018

Thank you for submitting your revised manuscript entitled "Recruitment of Ubiquitin-activating enzyme UBA1 to DNA by Poly(ADP-ribose) promotes ATR signalling" to Life Science Alliance. Your manuscript was reviewed and revised for another journal before, and you provided the reviewer reports of both rounds of peer review to us.

The reviewers were concerned that the revised manuscript does not provide sufficient insight into the physiological significance of your findings. This is in our view not a concern for publication in Life Science Alliance, and we would be happy to publish your work pending final minor revisions to clarify some lingering concerns of the reviewers and to meet our formatting guidelines. No further experiments need to be performed.

I would thus like to ask you to upload a final version of your manuscript (see formatting guidelines below). Please provide a point-by-point response to the remaining concerns of the reviewers and amend your manuscript text/figures accordingly. As mentioned above, no additional experiments are needed, but the issue of additional factors being recruited to the gapped versus duplex oligos, and whether some of those are contributing separately to Chk1 activation seems to have caused confusion (reviewer #1) and should be addressed in the point-by-point response and discussed more explicitly in the text in our view. The other issues mentioned by this reviewer should also be addressed in the point-by-point response and by re-wording the text. Reviewer #2's concern can be addressed as already outlined in your cover letter (discussing that binding is likely not taking place via a 'motif'). Reviewer #3's concern regarding use of only HeLa cells should be discussed as a limitation, and this reviewer's request for more PARP inhibition analyses should be discussed in the text as well. Please also address the minor points regarding text/figure representation of this reviewer.

To upload the final version of your manuscript, please log in to your account:

<https://lsa.msubmit.net/cgi-bin/main.plex>

You will be guided to complete the submission of your revised manuscript and to fill in all necessary information.

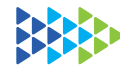

To avoid unnecessary delays in the acceptance and publication of your paper, please read the following information carefully.

#### A. FINAL FILES:

These items are required for acceptance.

-- An editable version of the final text (.DOC or .DOCX) is needed for copyediting (no PDFs).

-- High-resolution figure, supplementary figure and video files uploaded as individual files: See our detailed guidelines for preparing your production-ready images, <http://life-science-alliance.org/authorguide>

-- Summary blurb (enter in submission system): A short text summarizing in a single sentence the study (max. 200 characters including spaces). This text is used in conjunction with the titles of papers, hence should be informative and complementary to the title. It should describe the context and significance of the findings for a general readership; it should be written in the present tense and refer to the work in the third person. Author names should not be mentioned.

#### B. MANUSCRIPT ORGANIZATION AND FORMATTING:

Full guidelines are available on our Instructions for Authors page, <http://life-science-alliance.org/authorguide>

We encourage our authors to provide original source data, particularly uncropped/-processed electrophoretic blots and spreadsheets for the main figures of the manuscript. If you would like to add source data, we would welcome one PDF/Excel-file per figure for this information. These files will be linked online as supplementary "Source Data" files.

**\*\*Submission of a paper that does not conform to Life Science Alliance guidelines will delay the acceptance of your manuscript.\*\***

**\*\*It is Life Science Alliance policy that if requested, original data images must be made available to the editors. Failure to provide original images upon request will result in unavoidable delays in publication. Please ensure that you have access to all original data images prior to final submission.\*\***

**\*\*The license to publish form must be signed before your manuscript can be sent to production. A link to the electronic license to publish form will be sent to the corresponding author only. Please take a moment to check your funder requirements.\*\***

**\*\*Reviews, decision letters, and point-by-point responses associated with peer-review at Life Science Alliance will be published online, alongside the manuscript. If you do want to opt out of this transparent process, please let us know immediately.\*\***

Thank you for your attention to these final processing requirements.

Thank you for this interesting contribution, we look forward to publishing your paper in Life Science Alliance.

Thank you for submitting your revised manuscript entitled "Recruitment of Ubiquitin-activating enzyme UBA1 to DNA by Poly(ADP-ribose) promotes ATR signalling". We appreciate that you provided a point-by-point response to the concerns raised after re-review at a different journal and the changes made to the manuscript. It is a pleasure to let you know that your manuscript is now accepted for publication in Life Science Alliance. Congratulations on this interesting work.

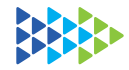

Your manuscript will now progress through copyediting and proofing. It is journal policy that authors provide original data upon request.

Reviews, decision letters, and point-by-point responses associated with peer-review at Life Science Alliance will be published online, alongside the manuscript. If you do want to opt out of this transparent process, please let us know immediately.

\*\*\*IMPORTANT: If you will be unreachable at any time, please provide us with the email address of an alternate author. Failure to respond to routine queries may lead to unavoidable delays in publication.\*\*\*

Scheduling details will be available from our production department. You will receive proofs shortly before the publication date. Only essential corrections can be made at the proof stage so if there are any minor final changes you wish to make to the manuscript, please let the journal office know now.

**DISTRIBUTION OF MATERIALS:**

Authors are required to distribute freely any materials used in experiments published in Life Science Alliance. Authors are encouraged to deposit materials used in their studies to the appropriate repositories for distribution to researchers.

You can contact the journal office with any questions, [contact@life-science-alliance.org](mailto:contact@life-science-alliance.org)

Again, congratulations on a very nice paper. I hope you found the process to be constructive and are pleased with how the manuscript was handled editorially. We look forward to future exciting submissions from your lab.
