# Supplementary material for: Recruitment of ubiquitin-activating enzyme UBA1 to DNA by poly(ADP-ribose) promotes ATR signalling
Source: Life Sci Alliance. 2018 Jun 21;1(3):e201800096. doi: 10.26508/lsa.201800096 (PMC6238597; doi:10.26508/lsa.201800096)
Supplement: Supplementary file 2 [file LSA-2018-00096_TableS2.xlsx]

## Sheet: Sheet1
SupTable2: List of UBA1 and UBA6 protein sequences and their corresponding UniProt IDs, used for phylogenetic reconstruction in this study.
Species	Protein	UniProt ID
Ailuropoda melanoleuca	UBA1	G1M3M6
Anolis carolinensis	UBA1	G1KE14
Anthurium amnicola	UBA1	A0A1D1XWH0
Aphyosemion striatum	UBA1	A0A1A7WE90
Apis mellifera	UBA1	A0A088AVS9
Arabidopsis thaliana	UBA1	P93028
Bactrocera cucurbitae	UBA1	A0A0A1XAD2
Bactrocera dorsalis	UBA1	A0A034W590
Bactrocera latifrons	UBA1	A0A0K8U1U1
Bos taurus	UBA1	A3KMV5
Brugia malayi	UBA1	A0A1I9G3P0
Caenorhabditis brenneri	UBA1	G0NUM9
Caenorhabditis briggsae	UBA1	A8WV26
Caenorhabditis elegans	UBA1	Q27481
Caenorhabditis remanei	UBA1	E3NL46
Callithrix jacchus	UBA1	H9KXL2
Candida albicans (strain WO-1)	UBA1	P52495
Canis lupus familiaris	UBA1	E2RGH5
Cavia porcellus	UBA1	H0UZR6
Ceratitis capitata	UBA1	W8B6N8
Ceratocystis fimbriata f. sp. platani	UBA1	A0A0F8BM99
Chlamydomonas reinhardtii	UBA1	A8J1C1
Chlorocebus sabaeus	UBA1	A0A0D9RMJ4
Cladophialophora carrionii	UBA1	A0A1C1C889
Cricetulus griseus	UBA1	G3IBG3
Danio rerio	UBA1	Q6P9P3
Dicentrarchus labrax	UBA1	E6ZG69
Dictyostelium discoideum	UBA1	Q55C16
Dipodomys ordii	UBA1	A0A1S3GST5
Drosophila melanogaster	UBA1	Q8T0L3
Ectocarpus siliculosus	UBA1	D7G2V5
Emiliania huxleyi	UBA1	R1D4A1
Equus caballus	UBA1	F7C6F2
Erinaceus europaeus	UBA1	A0A1S3A5I5
Felis catus	UBA1	M3VWK3
Fopius arisanus	UBA1	A0A0C9RUB8
Gorilla gorilla gorilla	UBA1	G3QX61
Guillardia theta CCMP2712	UBA1	L1JXU7
Heterocephalus glaber	UBA1	A0A0P6IZQ9
Homo sapiens	UBA1	P22314
Hydra vulgaris	UBA1	T2MG44
Ictidomys tridecemlineatus	UBA1	I3MGC1
Kluyveromyces marxianus DMKU3-1042	UBA1	W0T8H0
Komagataella pastoris	UBA1	A0A1B2JG57
Komagataella phaffii (strain ATCC 76273 / CBS 7435 / CECT 11047 / NRRL Y-11430 / Wegner 21-1)	UBA1	F2QV66
Latimeria chalumnae	UBA1	H2ZXQ2
Loxodonta africana	UBA1	G3UCY1
Lygus hesperus	UBA1	A0A0A9XZ86
Macaca mulatta	UBA1	G7NT38
Malassezia sympodialis (strain ATCC 42132)	UBA1	M5E7Y7
Monodelphis domestica	UBA1	F7C1J2
Mus musculus	UBA1	Q02053
Mustela putorius furo	UBA1	M3YNY7
Myotis lucifugus	UBA1	G1PM27
Neovison vison	UBA1	U6D114
Nicotiana attenuata	UBA1	A0A1J6IPT4
Nicotiana tabacum	UBA1	P93393
Nomascus leucogenys	UBA1	G1QSC4
Nosema bombycis (strain CQ1 / CVCC 102059)	UBA1	R0KWC7
Nothobranchius furzeri	UBA1	A0A1A8V7T6
Nothobranchius kadleci	UBA1	A0A1A8E6N4
Nothobranchius korthausae	UBA1	A0A1A8FUR8
Nothobranchius kuhntae	UBA1	A0A1A8KFC2
Nothobranchius pienaari	UBA1	A0A1A8LGD2
Nothobranchius rachovii	UBA1	A0A1A8QYZ5
Ophiophagus hannah	UBA1	V8PAE9
Oreochromis niloticus	UBA1	I3K374
Oryctolagus cuniculus	UBA1	Q29504
Oryzias latipes	UBA1	H2LXD0
Otolemur garnettii	UBA1	H0XDG6
Ovis aries	UBA1	W5PVT6
Pan troglodytes	UBA1	K7D7T2
Papio anubis	UBA1	A0A096N6N8
Penicillium roqueforti (strain FM164)	UBA1	W6Q439
Phaeodactylum tricornutum (strain CCAP 1055/1)	UBA1	B7FYG1
Plasmodium berghei	UBA1	A0A0Y9ZT82
Plasmodium gallinaceum	UBA1	A0A1J1GR94
Plasmodium malariae	UBA1	A0A1D3SP79
Plasmodium reichenowi	UBA1	A0A060RXC6
Plasmodium relictum	UBA1	A0A1J1HAW0
Poeciliopsis prolifica	UBA1	A0A0S7F666
Pongo abelii	UBA1	H2PVF8
Rattus norvegicus	UBA1	Q5U300
Saccharomyces cerevisiae (strain ATCC 204508 / S288c)	UBA1	P22515
Salmo salar	UBA1	A0A1S3LGR3
Sugiyamaella lignohabitans	UBA1	A0A167EXX9
Sus scrofa domesticus	UBA1	A0A0B8RZ10
Symbiodinium microadriaticum	UBA1	A0A1Q9DYX5
Thalassiosira pseudonana	UBA1	B8BYU7
Tokudaia muenninki	UBA1	A0A1Q2TR73
Toxocara canis	UBA1	A0A0B2VLR1
Trichinella britovi	UBA1	A0A0V1DDU8
Trichinella murrelli	UBA1	A0A0V0UH68
Trichinella nativa	UBA1	A0A0V1LT66
Trichinella nelsoni	UBA1	A0A0V0SP32
Trichinella papuae	UBA1	A0A0V1N0N3
Trichinella patagoniensis	UBA1	A0A0V1AF74
Trichinella pseudospiralis	UBA1	A0A0V1JF78
Trichinella spiralis	UBA1	A0A0V1C2E1
Trichinella zimbabwensis	UBA1	A0A0V1HV10
Triticum aestivum	UBA1	P20973
Tritrichomonas foetus	UBA1	A0A1J4JQX0
Xenopus laevis	UBA1	Q6P285
Xenopus tropicalis	UBA1	F6UG64
Anas platyrhynchos	UBA6	U3INK0
Bos taurus	UBA6	A4FV03
Gallus gallus	UBA6	F1NPI6
Homo sapiens	UBA6	A0AVT1
Mus musculus	UBA6	Q8C7R4
Takifugu rubripes	UBA6	H2SK81
